# Supplementary material for: Pathological and Prognostic Characterization of Craniopharyngioma Based on the Expression of TrkA, β-Catenin, Cell Cycle Markers, and BRAF V600E Mutation
Source: PubMed Central journal article supplement (PMC9190302; doi:10.3389/fendo.2022.859381), 2022-05-30
Supplement: DataSheet_1.pdf [file DataSheet_1.pdf]

**Pathological and prognostic characterization of Craniopharyngioma based on the expression of TrkA,  $\beta$ -catenin, cell cycle markers and BRAF V600E mutation**

*Supporting Information*

Cheng Xu<sup>#</sup>, Songhan Ge<sup>#</sup>, Juanxian Cheng, Huabing Gao, Fenfen Zhang, and Anjia Han<sup>\*</sup>

<sup>1</sup>Department of Pathology, The First Affiliated Hospital, Sun Yat-sen University, Guangzhou 510080, Guangdong, P. R. China

<sup>#</sup> Cheng Xu and Songhan Ge contributed equally to this work.

**Running title:** TrkA,  $\beta$ -catenin, and BRAF V600E mutation in craniopharyngioma

<sup>\*</sup>Corresponding Author: Anjia Han, MD

Department of Pathology, The First Affiliated Hospital, Sun Yat-sen University, 58, Zhongshan Road II, Guangzhou 510080, China.

Tel/Fax: 8620-87332235

E-mail: hananjia@mail.sysu.edu.cn

**Table S1**

**Table S1.** The clinical characteristics of each enrolled craniopharyngioma patient.

| Case No. | Histological type | Gender, Age (years) | Tumor location      | Tumor size (cm) | Tumor shape    | Tumor Consistency | Calcification |              | Adhesion strength | Surgical details          |                     | Additional treatment | Follow-up (months) | Recurrence | Recurrence time (months) |
|----------|-------------------|---------------------|---------------------|-----------------|----------------|-------------------|---------------|--------------|-------------------|---------------------------|---------------------|----------------------|--------------------|------------|--------------------------|
|          |                   |                     |                     |                 |                |                   | Present       | Degree       |                   | Procedure type            | Extent of resection |                      |                    |            |                          |
| 1        | ACP               | F, 26               | S/SS-secondary 3V   | 3.0             | Pear-like      | Mixed             | No            | /            | Tight             | Open (endoscope assisted) | GTR                 | 10                   | No                 | /          |                          |
| 2        | ACP               | M, 57               | S/SS-secondary 3V   | 5.0             | Elliptical     | Mixed             | No            | /            | Tight             | Open                      | GTR                 | 48                   | No                 | /          |                          |
| 3        | ACP               | M, 68               | Strictly 3V         | 3.1             | Multilobulated | Solid             | Present       | Punctate     | Tight             | Open                      | GTR                 | 36                   | No                 | /          |                          |
| 4        | ACP               | F, 4                | S/SS-secondary 3V   | 4.0             | Elliptical     | Cystic            | Present       | Eggshell     | Tight             | Purely endoscopic         | GTR                 | 30                   | No                 | /          |                          |
| 5        | ACP               | F, 7                | S/SS-pseudo 3V      | 5.3             | Elliptical     | Mixed             | Present       | Eggshell     | Invasion          | Open                      | GTR                 | 6                    | No                 | /          |                          |
| 6        | ACP               | F, 37               | Strictly 3V         | 3.5             | Elliptical     | Cystic            | Present       | Punctate     | Tight             | Purely endoscopic         | STR/PTR             | 24                   | No                 | /          |                          |
| 7        | ACP               | M, 47               | Infundibulo-tuberal | 2.7             | Dumbbell       | Mixed             | Present       | Eggshell     | Invasion          | Purely endoscopic         | STR/PTR             | 12                   | No                 | /          |                          |
| 8        | ACP               | M, 14               | Infundibulo-tuberal | 4.0             | Multilobulated | Mixed             | Present       | Eggshell     | Invasion          | Purely endoscopic         | GTR                 | 30                   | No                 | /          |                          |
| 9        | ACP               | M, 5                | S/SS-pseudo 3V      | 7.6             | Multilobulated | Mixed             | Present       | Big, popcorn | Tight             | Open                      | GTR                 | 9                    | No                 | /          |                          |
| 10       | ACP               | M, 11               | Infundibulo-tuberal | 3.0             | Elliptical     | Mixed             | Present       | Eggshell     | Tight             | Open                      | GTR                 | 12                   | No                 | /          |                          |
| 11       | ACP               | M, 15               | Infundibulo-tuberal | 3.5             | Elliptical     | Mixed             | Present       | Punctate     | Tight             | Open (endoscope assisted) | GTR                 | 3                    | No                 | /          |                          |
| 12       | ACP               | M, 38               | Infundibulo-tuberal | 3.4             | Pear-like      | Mixed             | Present       | Punctate     | Tight             | Open                      | GTR                 | 12                   | No                 | /          |                          |
| 13       | ACP               | M, 21               | S/SS-secondary 3V   | 5.0             | Elliptical     | Mixed             | Present       | Big, popcorn | Invasion          | Open (endoscope assisted) | GTR                 | 24                   | No                 | /          |                          |
| 14       | ACP               | M, 18               | S/SS-pseudo 3V      | 3.8             | Elliptical     | Mixed             | Present       | Patchy       | Invasion          | Open                      | GTR                 | 12                   | No                 | /          |                          |
| 15       | ACP               | F, 14               | Infundibulo-tuberal | 2.0             | Round          | Mixed             | Present       | Big, popcorn | Tight             | Open                      | GTR                 | 48                   | No                 | /          |                          |
| 16       | ACP               | F, 51               | S/SS-secondary 3V   | 4.0             | Elliptical     | Mixed             | Present       | Punctate     | Tight             | Open                      | GTR                 | 18                   | No                 | /          |                          |
| 17       | ACP               | F, 56               | S/SS-pseudo 3V      | 3.4             | Multilobulated | Mixed             | Present       | Punctate     | Invasion          | Open (endoscope assisted) | STR/PTR             | 36                   | Yes                | 6          |                          |
| 18       | ACP               | M, 51               | Infundibulo-tuberal | 2.6             | Round          | Mixed             | Present       | Eggshell     | Tight             | Open                      | GTR                 | 24                   | No                 | /          |                          |
| 19       | ACP               | F, 55               | S/SS-secondary 3V   | 2.4             | Elliptical     | Solid             | Present       | Eggshell     | Tight             | Open                      | GTR                 | 30                   | No                 | /          |                          |
| 20       | ACP               | F, 58               | S/SS                | 1.0             | Elliptical     | Mixed             | Present       | Punctate     | Tight             | Open                      | GTR                 | 24                   | No                 | /          |                          |
| 21       | ACP               | F, 55               | Infundibulo-tuberal | 1.9             | Multilobulated | Mixed             | Present       | Eggshell     | Tight             | Open                      | GTR                 | 48                   | No                 | /          |                          |
| 22       | ACP               | F, 60               | S/SS-pseudo 3V      | 4.0             | Multilobulated | Mixed             | Present       | Big, popcorn | Invasion          | Open                      | GTR                 | 21                   | No                 | /          |                          |
| 23       | ACP               | M, 55               | S/SS-secondary 3V   | 2.0             | Round          | Solid             | Present       | Punctate     | Loose             | Open                      | GTR                 | 20                   | No                 | /          |                          |
| 24       | ACP               | F, 48               | Infundibulo-tuberal | 2.5             | Round          | Cystic            | Present       | Patchy       | Invasion          | Open (endoscope assisted) | STR/PTR             | 30                   | No                 | /          |                          |
| 25       | ACP               | F, 62               | S/SS                | 2.2             | Elliptical     | Mixed             | Present       | Punctate     | Tight             | Open                      | GTR                 | 35                   | No                 | /          |                          |
| 26       | ACP               | M, 45               | Strictly 3V         | 3.7             | Pear-like      | Mixed             | Present       | Punctate     | Tight             | Open                      | GTR                 | 24                   | No                 | /          |                          |
| 27       | ACP               | M, 23               | Infundibulo-tuberal | 3.8             | Elliptical     | Mixed             | Present       | Big, popcorn | Tight             | Open                      | GTR                 | 29                   | No                 | /          |                          |
| 28       | ACP               | F, 21               | Infundibulo-tuberal | 2.1             | Elliptical     | Mixed             | Present       | Punctate     | Tight             | Open (endoscope assisted) | NTR                 | 36                   | No                 | /          |                          |
| 29       | ACP               | M, 53               | Infundibulo-tuberal | 3.2             | Elliptical     | Mixed             | Present       | Eggshell     | Tight             | Open                      | GTR                 | 24                   | No                 | /          |                          |
| 30       | ACP               | M, 8                | S/SS-pseudo 3V      | 6.4             | Elliptical     | Mixed             | Present       | Eggshell     | Invasion          | Open                      | STR/PTR             | 36                   | Yes                | 30         |                          |
| 31       | ACP               | M, 32               | Infundibulo-tuberal | 3.2             | Elliptical     | Mixed             | Present       | Punctate     | Tight             | Open                      | GTR                 | 24                   | No                 | /          |                          |
| 32       | ACP               | M, 24               | S/SS                | 2.7             | Elliptical     | Mixed             | Present       | Eggshell     | Tight             | Purely endoscopic         | GTR                 | 28                   | No                 | /          |                          |
| 33       | ACP               | F, 10               | S/SS-secondary 3V   | 3.8             | Pear-like      | Mixed             | No            | /            | Tight             | Open                      | GTR                 | 30                   | No                 | /          |                          |
| 34       | ACP               | F, 14               | Infundibulo-tuberal | 3.9             | Round          | Cystic            | Present       | Patchy       | Tight             | Purely endoscopic         | STR/PTR             | 30                   | No                 | /          |                          |
| 35       | ACP               | F, 11               | Strictly 3V         | 4.5             | Elliptical     | Mixed             | Present       | Punctate     | Tight             | Open                      | GTR                 | 36                   | No                 | /          |                          |
| 36       | ACP               | M, 17               | Infundibulo-tuberal | 4.3             | Round          | Mixed             | Present       | Big, popcorn | Tight             | Open                      | GTR                 | 36                   | No                 | /          |                          |
| 37       | ACP               | M, 45               | Infundibulo-tuberal | 4.7             | Elliptical     | Mixed             | Present       | Punctate     | Tight             | Open                      | GTR                 | 30                   | No                 | /          |                          |

|    |          |       |                     |     |                |        |         |              |          |                           |         |    |                                            |    |
|----|----------|-------|---------------------|-----|----------------|--------|---------|--------------|----------|---------------------------|---------|----|--------------------------------------------|----|
| 38 | ACP      | M, 12 | Infundibulo-tuberal | 3.7 | Elliptical     | Cystic | Present | Punctate     | Invasion | Open                      | GTR     | 24 | No                                         | /  |
| 39 | ACP      | M, 14 | Infundibulo-tuberal | 4.3 | Round          | Cystic | Present | Patchy       | Invasion | Purely endoscopic         | NTR     | 17 | yes                                        | 5  |
| 40 | ACP      | M, 24 | Infundibulo-tuberal | 3   | Elliptical     | Mixed  | Present | Eggshell     | Invasion | Purely endoscopic         | STR/PTR | 48 | yes                                        | 42 |
| 41 | ACP      | F, 75 | S/SS-secondary 3V   | 4.5 | Round          | Mixed  | Present | Punctate     | Tight    | Open (endoscope assisted) | NTR     | 11 | yes                                        | 5  |
|    |          |       |                     |     |                |        |         |              |          |                           |         |    | STR (5months after the first operation)    |    |
|    |          |       |                     |     |                |        |         |              |          |                           |         |    | RT (7months after the secondary operation) |    |
| 42 | ACP      | M, 33 | Infundibulo-tuberal | 4   | Elliptical     | Mixed  | Present | Patchy       | Invasion | Open                      | GTR     | 24 | yes                                        | 24 |
| 43 | Mixed-CP | F, 7  | Infundibulo-tuberal | 2.8 | Elliptical     | Mixed  | Present | Big, popcorn | Invasion | Open                      | STR/PTR | 12 | yes                                        | 7  |
| 44 | ACP      | M, 23 | S/SS                | 2.5 | Dumbbell       | Mixed  | Present | Patchy       | Invasion | Purely endoscopic         | STR/PTR | 30 | yes                                        | 24 |
| 45 | ACP      | F, 36 | Infundibulo-tuberal | 2.9 | Elliptical     | Mixed  | Present | Patchy       | Invasion | Open (endoscope assisted) | GTR     | 12 | yes                                        | 6  |
| 46 | ACP      | M, 36 | Infundibulo-tuberal | 7.3 | Pear-like      | Mixed  | Present | Punctate     | Tight    | Open                      | STR/PTR | 60 | yes                                        | 60 |
| 47 | ACP      | F, 35 | S/SS                | 2.7 | Elliptical     | Mixed  | Present | Eggshell     | Invasion | Open (endoscope assisted) | STR/PTR | 24 | yes                                        | 6  |
| 48 | PCP      | M, 60 | S/SS-secondary 3V   | 3.0 | Elliptical     | Mixed  | Present | Patchy       | Invasion | Open                      | STR/PTR | 45 | Yes                                        | 42 |
| 49 | PCP      | M, 34 | Infundibulo-tuberal | 2.6 | Elliptical     | Cystic | No      | /            | Tight    | Purely endoscopic         | GTR     | 6  | No                                         | /  |
| 50 | PCP      | M, 31 | S/SS                | 2.5 | Round          | Cystic | No      | /            | Tight    | Open                      | GTR     | 12 | No                                         | /  |
| 51 | PCP      | F, 31 | Infundibulo-tuberal | 3.8 | Elliptical     | Cystic | No      | /            | Tight    | Open                      | GTR     | 12 | No                                         | /  |
| 52 | PCP      | F, 10 | Strictly 3V         | 4.0 | Multilobulated | Cystic | No      | /            | Loose    | Open                      | GTR     | 30 | No                                         | /  |
| 53 | PCP      | F, 51 | S/SS-secondary 3V   | 3.0 | Round          | Cystic | No      | /            | Tight    | Open                      | GTR     | 24 | No                                         | /  |
| 54 | PCP      | M, 50 | S/SS-secondary 3V   | 2.5 | Elliptical     | Cystic | No      | /            | Tight    | Open                      | GTR     | 26 | No                                         | /  |
| 55 | PCP      | M, 57 | S/SS-pseudo 3V      | 4.0 | Pear-like      | Cystic | No      | /            | Tight    | Open                      | GTR     | 18 | No                                         | /  |
| 56 | PCP      | M, 48 | S/SS-pseudo 3V      | 2.9 | Round          | Cystic | No      | /            | Tight    | Open                      | GTR     | 30 | No                                         | /  |
| 57 | PCP      | M, 68 | Strictly 3V         | 3.0 | Round          | Solid  | Present | Big, popcorn | Invasion | Open                      | GTR     | 24 | No                                         | /  |
| 58 | PCP      | M, 28 | S/SS-secondary 3V   | 7.0 | Elliptical     | Cystic | No      | /            | Invasion | Open                      | STR/PTR | 36 | Yes                                        | 24 |
| 59 | PCP      | M, 25 | Infundibulo-tuberal | 5.3 | Round          | Cystic | No      | /            | Invasion | Purely endoscopic         | STR/PTR | 24 | Yes                                        | 6  |
| 60 | PCP      | M, 50 | Strictly 3V         | 3.7 | Elliptical     | Cystic | No      | /            | Tight    | Open                      | STR/PTR | 12 | Yes                                        | 2  |
| 61 | PCP      | M, 64 | S/SS-pseudo 3V      | 4.8 | Round          | Cystic | No      | /            | Fusion   | Purely endoscopic         | NTR     | 15 | Yes                                        | 9  |

S/SS: sellar-suprasellar; 3V: the third ventricle; Mixed: mixed solid-cystic; GTR: gross total resection, NTR: near-total resection, STR/PTR: subtotal resection/partial resection; RT: radiotherapy; pre OMMAY CI: Pre-OMMAY Capsule Implantation.

**Table S2****Table S2.** The correlation between ki-67 L.I. with ACP and PCP recurrence.

| Histologic type | N=16<br>No. (%) | Ki-67 L.I.     |               | X <sup>2</sup> | P     |
|-----------------|-----------------|----------------|---------------|----------------|-------|
|                 |                 | 0-4<br>No. (%) | ≥5<br>No. (%) |                |       |
| ACP             | 11(69)          | 3(27)          | 8(73)         | 0.097          | 0.453 |
| PCP             | 5(31)           | 1(20)          | 4(80)         |                |       |

L.I.: labeling index.

**Table S3****Table S3.** The relationship between Ki-67 expression and recurrence with the degree to CP adhesion and tumor resection.

| Variables  | N=59<br>No. (%) | Adhesion strength      |                            | X <sup>2</sup> | P value          | Extent of tumor resection |                    | X <sup>2</sup> | P value          |
|------------|-----------------|------------------------|----------------------------|----------------|------------------|---------------------------|--------------------|----------------|------------------|
|            |                 | Loose+Tight<br>No. (%) | Invasion+Fusion<br>No. (%) |                |                  | GTR<br>No. (%)            | Non GTR<br>No. (%) |                |                  |
| Ki-67 L.I. |                 |                        |                            | 3.276          | 0.103            |                           |                    | 5.217          | <b>0.027</b>     |
| 0-4        | 25(42)          | 19(76)                 | 6(24)                      |                |                  | 21(84)                    | 4(16)              |                |                  |
| ≥5         | 34(58)          | 18(53)                 | 16(47)                     |                |                  | 19(56)                    | 15(44)             |                |                  |
| Recurrence |                 |                        |                            |                |                  |                           |                    |                |                  |
| Yes        | 16(27)          | 3(8)                   | 13(59)                     | 18.14          | <b>&lt;0.001</b> | 2(5)                      | 14(74)             | 30.74<br>6     | <b>&lt;0.001</b> |
| No         | 43(73)          | 34(92)                 | 9(41)                      |                |                  | 38(95)                    | 5(26)              |                |                  |

GTR: gross total resection; L.I.:labeling index.
